# Supplementary material for: Thymoquinone chemically conjugated to doxorubicin: antitumor activity and subcellular localization
Source: Royal Society of Chemistry journal article supplement (doi:10.1039/d5ra05492c), 2025-01-01
Supplement: d5ra05492c1.pdf [file d5ra05492c1.pdf]

**(Supplementary file)**

**Thymoquinone chemically conjugated to Doxorubicin: Antitumor activity and subcellular localization**

**Ismail Sami Mahmoud<sup>1\*</sup>, Hamdi Nsairat<sup>2\*</sup>, Shorouq Alsotari<sup>3</sup>, Areej Jaber<sup>2</sup>, Ezaldeen Esawi<sup>4</sup>, Hiba Abdelnabi<sup>3</sup>, Majed Al Holi<sup>3</sup>, El Soubani Fatima<sup>5</sup>, Walhan Alshaer<sup>2,3</sup>, Fadwa Odeh<sup>6</sup>**

1. Department of Medical Laboratory Sciences, Faculty of Applied Medical Sciences, The Hashemite University, Zarqa 13133, Jordan.

2. Pharmacological and Diagnostic Research Center, Faculty of Pharmacy, Al-Ahliyya Amman University, Amman 19328, Jordan

3. Cell Therapy Centre, The University of Jordan, Amman 11942, Jordan.

4. South Australian ImmunoGENomics Cancer Institute, University of Adelaide, Adelaide, SA 5000, Australia

5. Department of Chemistry, The Hashemite University, Zarqa 13133, Jordan.

6. Department of Chemistry, The University of Jordan, Amman, Jordan

\*Correspondence to:

**Ismail Sami Mahmoud, PhD**

E-mail: [ismails@hu.edu.jo](mailto:ismails@hu.edu.jo)

Tel. 00962797545880

ORCID# [0000-0002-6210-9832](https://orcid.org/0000-0002-6210-9832)

**Hamdi Nsairat, PhD**

Email: [h.alnseirat@ammanu.edu.jo](mailto:h.alnseirat@ammanu.edu.jo)

Tel. 00962796167327

ORCID# [0000-0001-5916-5879](https://orcid.org/0000-0001-5916-5879)

## Characterization of TQ-Suc-Dox conjugate

Analysis of both  $^1\text{H}$ - and  $^{13}\text{C}$ -dept135 NMR spectra confirmed the formation of TQ-Suc-Dox. The  $^1\text{H}$ -NMR data for TQ (structure I) and DOX (structure II) which are the main precursors of TQ-Suc-Dox, are summarized in Tables 1 and 2 to ease comparison with the spectrum of TQ-Suc-Dox. The  $^1\text{H}$ -NMR spectrum of this compound is shown in Sup fig 1. All protons from the parent compounds appear in the spectrum. The appearance of the proton of the TQ ring is clear at  $\sim 6.5$  ppm, and several additional signals in the aliphatic region. In addition, upon the formation of TQ-Suc-Dox, several  $\text{CH}_2$  can be observed using  $^{13}\text{C}$ -dept135-NMR at 19.1, 22.6, 29.4, 30.6, and 64.5 ppm corresponding to 1, 4, 6, b, and the Suc protons (Sup fig 1). However, some of the protons were hard to find due to the solvent signals, so the spectrum was also obtained in  $\text{CD}_3\text{OD}$ . The  $-\text{CO}-\text{CH}_2-\text{OH}$  protons of  $\text{CH}_2$  appeared at 3.5 ppm and were directly connected to the  $\text{CH}_2$  carbon at  $\sim 70$  ppm. The assignments were made based on  $^1\text{H}$ - $^1\text{H}$  and  $^1\text{H}$ - $^{13}\text{C}$  correlation NMR experiments. In addition, the amine group ( $\text{NH}_2$ ) in DOX (appears at  $\sim 7.8$  ppm and  $\sim 42.6$  ppm for  $^1\text{H}$  and  $^{15}\text{N}$  atoms respectively) was converted to the amide group ( $-\text{CO}-\text{NH}-$ ) which appeared at 7.5 ppm and 150.2 ppm for  $^1\text{H}$  and  $^{15}\text{N}$  atoms respectively (Sup fig 2) which is close to values in the literature.

The formation of TQ-Suc-Dox conjugate was also confirmed using high resolution mass spectrometry. HRMS (ESI) on the negative mode ( $[\text{M}-\text{H}^+]^-$ ) confirmed TQ-Suc-Dox ( $\text{C}_{40}\text{H}_{43}\text{NO}_{14}$ ) synthesis, where the calculated and the found values were 760.26108 g/mol and 760.26023 g/mol, respectively, with an error of 0.85 mDa (Sup fig 3A). TQ-Suc-Dox synthesis was also confirmed by the positive mode ( $[\text{M}+\text{Na}^+]^+$ ) with calculated and found values were 784.25758 g/mol and 784.25892 g/mol, respectively, with an error of -1.43 mDa (Sup fig 3B). Also, purity of the generated TQ-Suc-Dox compound was analyzed using HPLC (Shimadzu, Japan), and  $\sim 90\%$  purity was detected for the compound (Sup fig 4).

## Sup. Fig 1

TQ-Suc-Dox 1H-NMR

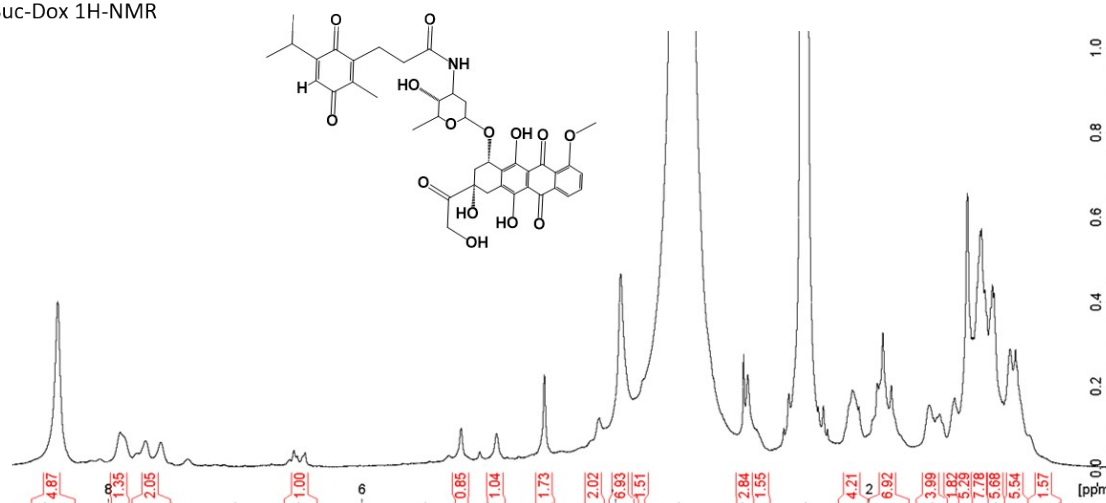

TQ-Suc-Dox dept135-NMR

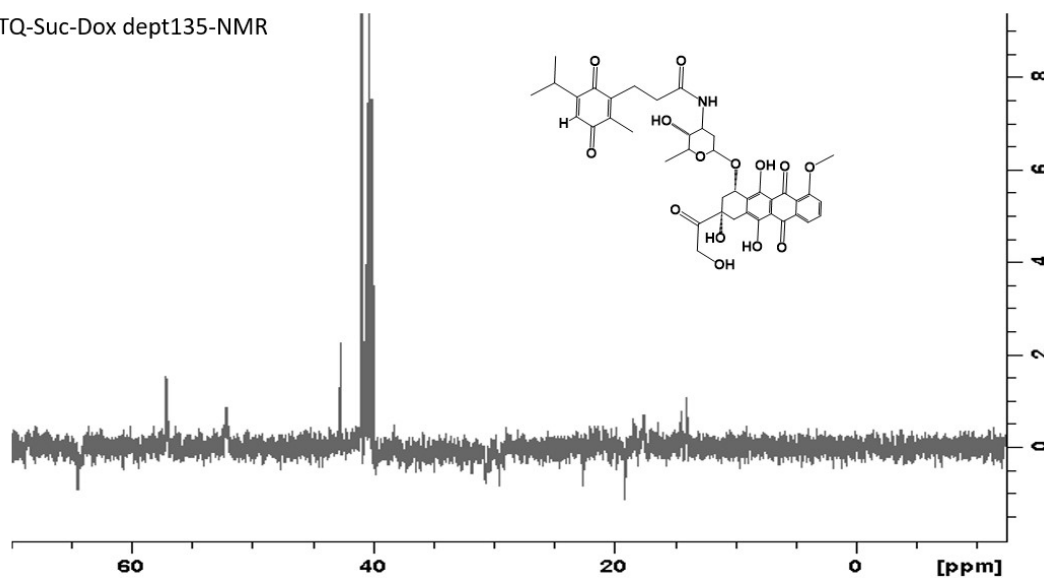

**Sup. Fig 1A:**  $^1\text{H}$ -NMR, and  $^{13}\text{C}$ -dept-135 NMR spectra for TQ-Suc-Dox in  $\text{d}_6$ -DMSO at 25 °C. NMR spectra were obtained using Bruker Biospin AG Magnet system 500MHz/54mm instrument

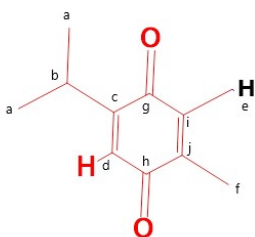

**Table 1:  $^1\text{H}$ -NMR data for TQ**

Structure I

| Type | $\delta$ (ppm) | Integration |
|------|----------------|-------------|
| b    | 2.96           | 1, m        |
| a    | 1.109          | 6, d        |
| f    | 1.99           | 3, d        |
| e    | 6.5            | 1, m        |
| d    | 6.5            | 1, d        |

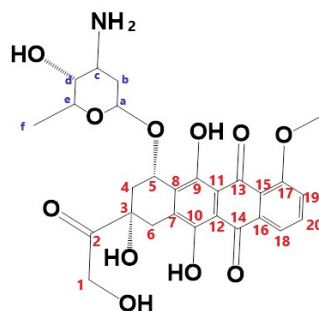

**Table 2:  $^1\text{H}$ -NMR data for Dox in  $\text{d}_6$ -DMSO.**

Structure II

| proton | $\delta$ (ppm) | I        | proton | $\delta$ (ppm) | I       | proton | $\delta$ (ppm) | Integration |
|--------|----------------|----------|--------|----------------|---------|--------|----------------|-------------|
| 1      | 4.54           | 2, d     | 18     | 7.8            | 1, d**  | c      | 3.3            | 1, *        |
| 3-OH   | 5.4            | 1, s *** | 19     | 7.6            | 1, dd   | NH2    | 7.8            | 2, **       |
| 4      | 2.08 & 2.12    | 2, qd    | 20     | 7.8            | 1, t ** | d      | 3.5            | 1, d        |
| 5      | 4.8            | 1, t     | O-CH3  | 4.0            | 3, s    | d-OH   | 5.4            | 1, s ***    |
| 6      | 2.8 & 2.9      | 2, dd    | 1-OH   | 4.9            | 1, t    | e      | 4.14           | 1, m        |
| 9-OH   | 14.0           | 1, br    | a      | 5.25           | 1, t    | e-CH3  | 1.12           | 3, d        |
| 10-OH  | 13.2           | 1, br    | b      | 1.65 & 1.85    | 2, dt   |        |                |             |

### Structure III

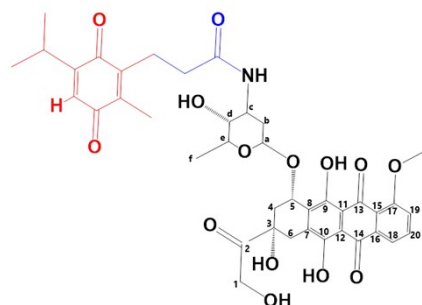

**Table 3:  $^1\text{H}$ -NMR data for TQ-Suc-Dox in  $\text{d}_6$ -DMSO**

| proton | $\delta$ (ppm) | proton            | $\delta$ (ppm) | proton                          | $\delta$ (ppm) |
|--------|----------------|-------------------|----------------|---------------------------------|----------------|
| 1      | 4.56           | 18                | 7.9            | d                               | 3.7            |
| 1-OH   | 4.9            | 19                | 7.6            | e                               | 4.1            |
| 3-OH   | 5.3            | 20                | 7.7            | f                               | ~1.1           |
| 4      | 2.1            | O-CH <sub>3</sub> | 3.95           | CH <sub>2suc</sub>              | 3.5            |
| 5      | 4.9            | a                 | 5.2            | CH <sub>3TQ</sub>               | 1.9            |
| 9-OH   | ~14 br         | b                 | 1.5            | (CH <sub>3</sub> ) <sub>2</sub> | ~1.1           |
| 10-OH  | ~14 br         | c                 | 3.5            | CH <sub>TQ</sub>                | 2.9            |

**Sup. Fig 2**

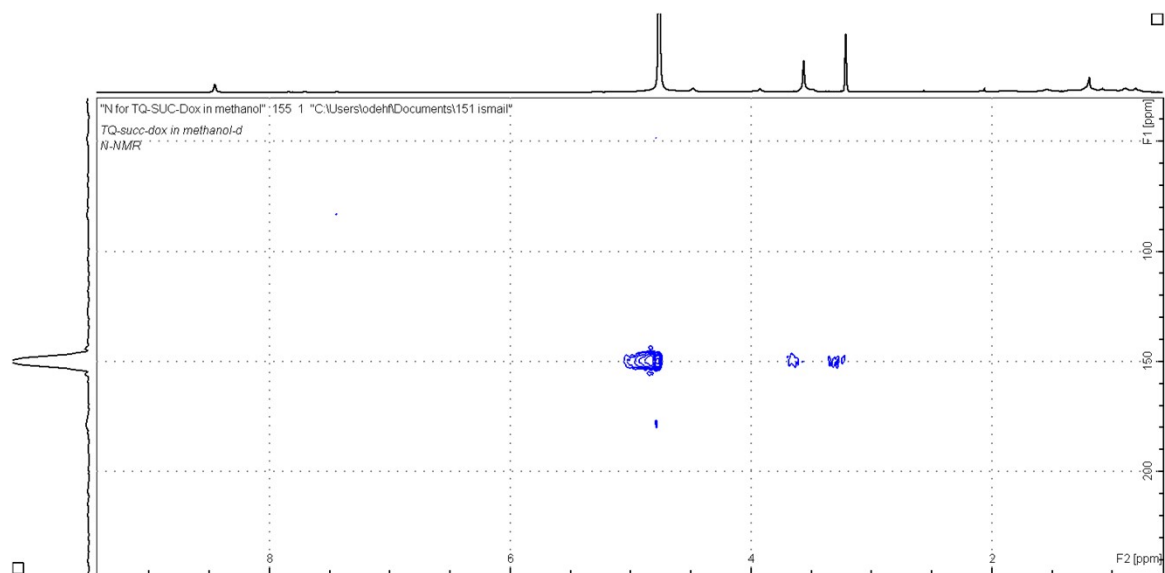

**Sup. Fig 2:**  $^1\text{H}$ - $^{15}\text{N}$ -HMBC NMR spectrum for TQ-Suc-Dox in  $\text{CD}_3\text{OD}$

**Sup. Fig 3**

**A)**

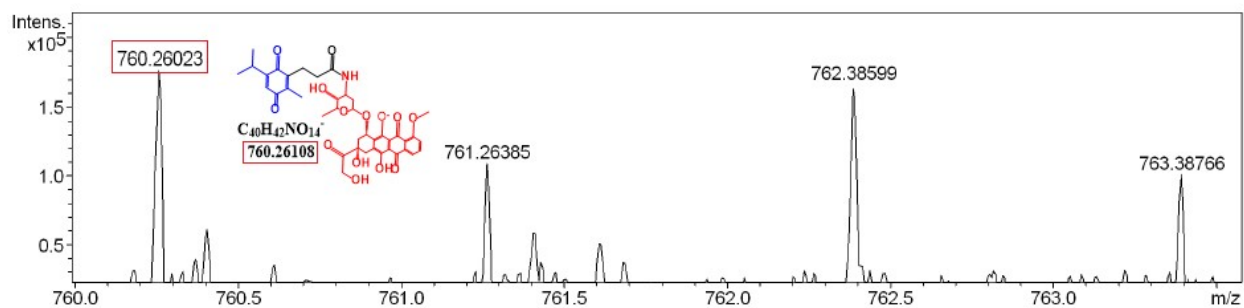

**B)**

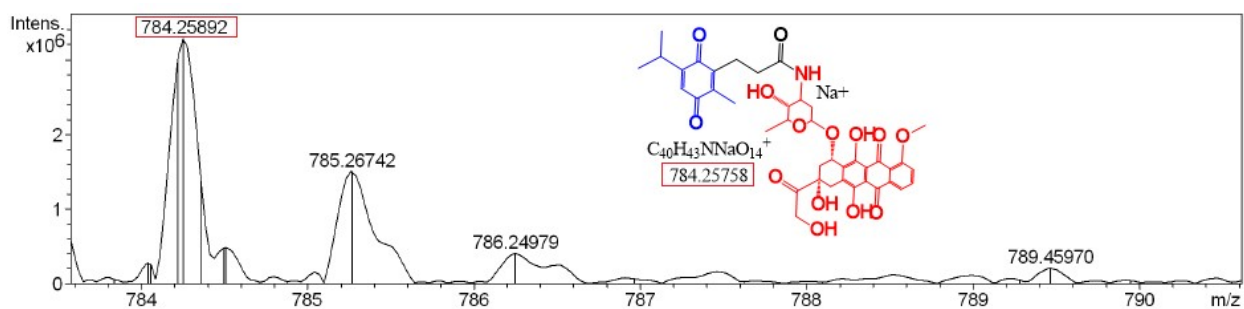

**Sup. Fig 3:** Mass spectrum of (A) TQ-Suc-Dox on  $([M-H]^+)$  (B) TQ-Suc-Dox on  $([M+Na]^+)$ . High-resolution mass spectra (HR-MS) used the electrospray ion trap (ESI) technique by collision-induced dissociation on a Bruker APEX-4 (7 Tesla).

**Sup. Fig 4**

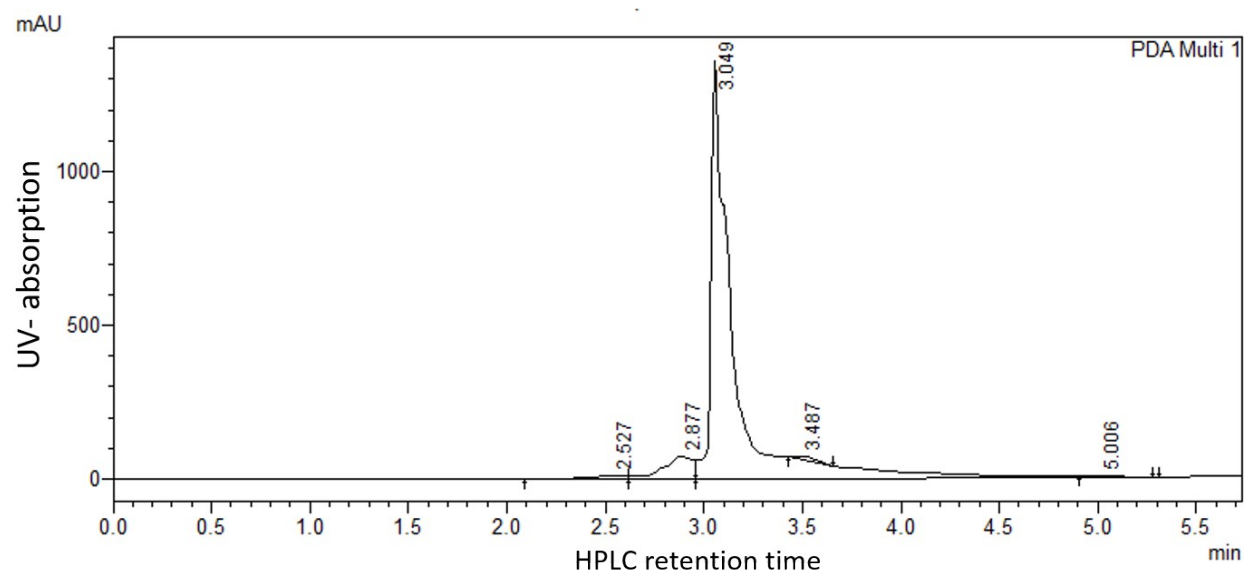

**Sup. Fig 4.** Reverse phase HPLC analysis, C18 column has been used, the mobile phase composed of methanol: acetonitrile (60:40 volume ratio), the flow rate 1 ml/min and the detection wavelength at 254 nm.
